# Supplementary material for: Unveiling exceptionally robust valley contrast in AA- and AB-stacked bilayer WS2
Source: Royal Society of Chemistry journal article supplement (doi:10.1039/c8nh00306h), 2018-11-01
Supplement: c8nh00306h1.pdf [file c8nh00306h1.pdf]

## Supplementary Information

### Unveiling exceptional valley contrast in AA- and AB-stacked bilayer WS<sub>2</sub>

*Yanlong Wang,<sup>1,2</sup> Chunxiao Cong,<sup>3</sup> \* Jingzhi Shang,<sup>1</sup> Mustafa Eginligil,<sup>4</sup> Yuqi Jin,<sup>2</sup> Gang Li,<sup>2</sup> Yu Chen,<sup>1</sup>*

*Namphung Peimyoo,<sup>1</sup> and Ting Yu<sup>1</sup> \**

<sup>1</sup>Division of Physics and Applied Physics, School of Physical and Mathematical Sciences, Nanyang Technological University, 637371, Singapore

<sup>2</sup>Key Laboratory of Chemical Lasers, Dalian Institute of Chemical Physics, Chinese Academy of Sciences, Dalian 116023, China

<sup>3</sup>State Key Laboratory of ASIC & System, School of Information Science and Technology, Fudan University, Shanghai 200433, China

<sup>4</sup>Key Laboratory of Flexible Electronics (KLOFE) & Institute of Advanced Materials (IAM), Jiangsu National Synergetic Innovation Centre for Advanced Materials (SICAM), Nanjing Tech University (NanjingTech), 30 South Puzhu Road, Nanjing 211816, China

\*Address correspondence to [yuting@ntu.edu.sg](mailto:yuting@ntu.edu.sg); [cxcong@fudan.edu.cn](mailto:cxcong@fudan.edu.cn)

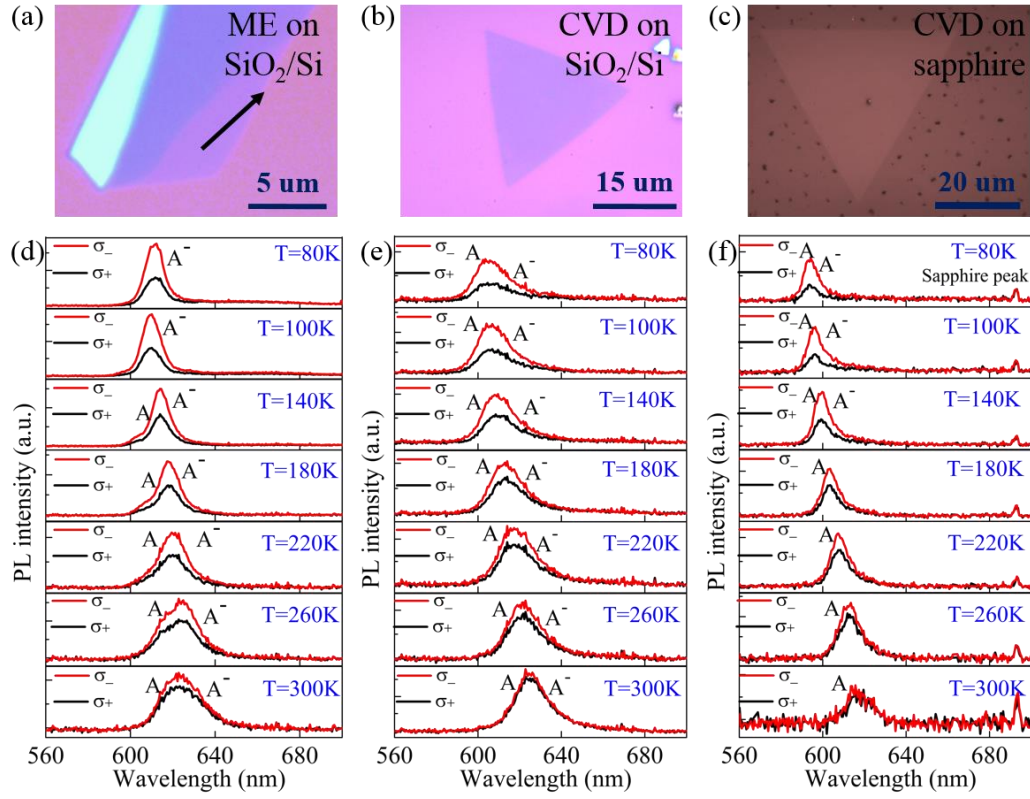

**Fig. S1** Optical images of (a) ME and (b) CVD-grown monolayer  $\text{WS}_2$  on  $\text{SiO}_2/\text{Si}$  substrate and (c) CVD-grown monolayer  $\text{WS}_2$  on sapphire substrate. (d) - (f) show circularly polarized PL spectra as a function of temperature corresponding to (a) - (c), respectively. The excitation light is left-circularly polarized in all the measurements.

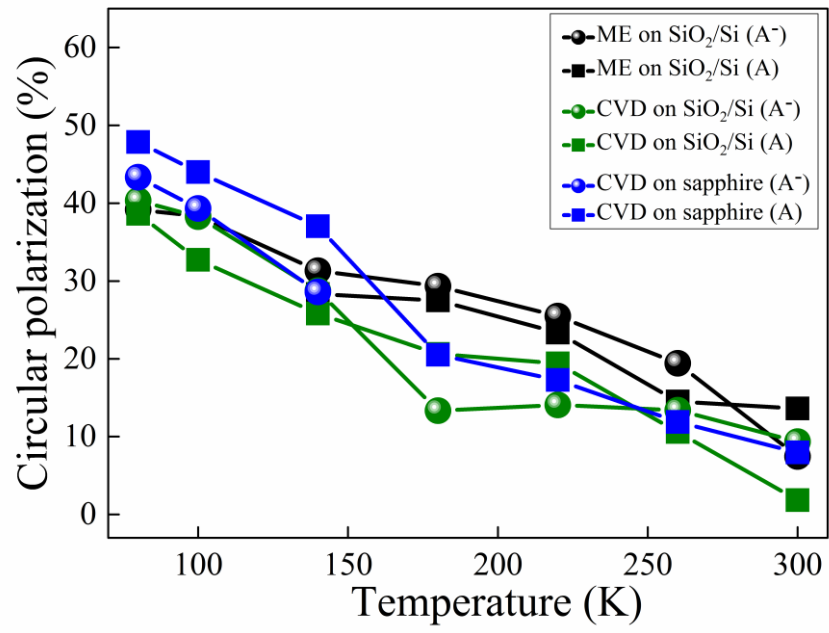

**Fig. S2** Temperature dependence of circular polarization of A and A<sup>-</sup> peaks for different types of monolayer WS<sub>2</sub> samples.

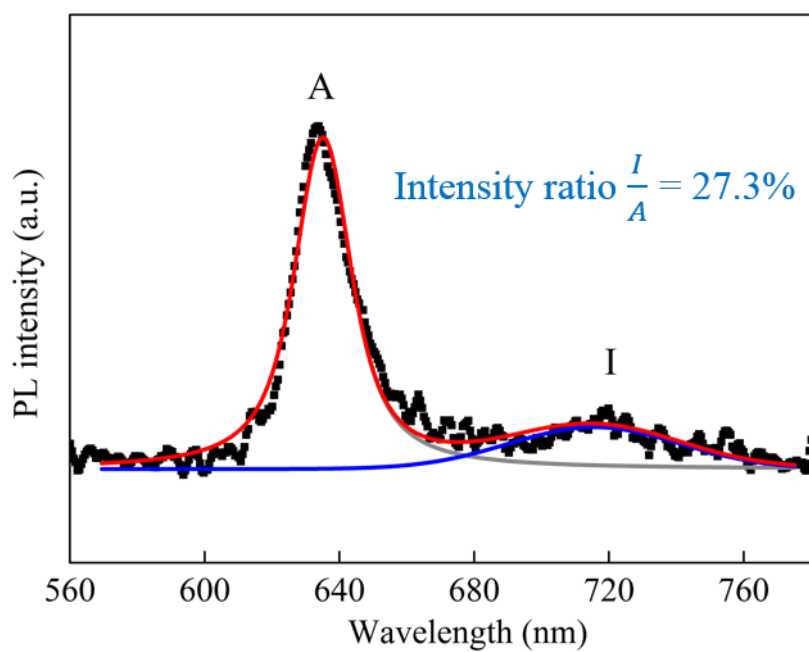

**Fig. S3** PL spectrum of CVD-grown AA-stacked bilayer WS<sub>2</sub> on SiO<sub>2</sub>/Si substrate at room temperature measured with integration time of 10 seconds. The intensity ratio of I and A peaks is 27.3%.

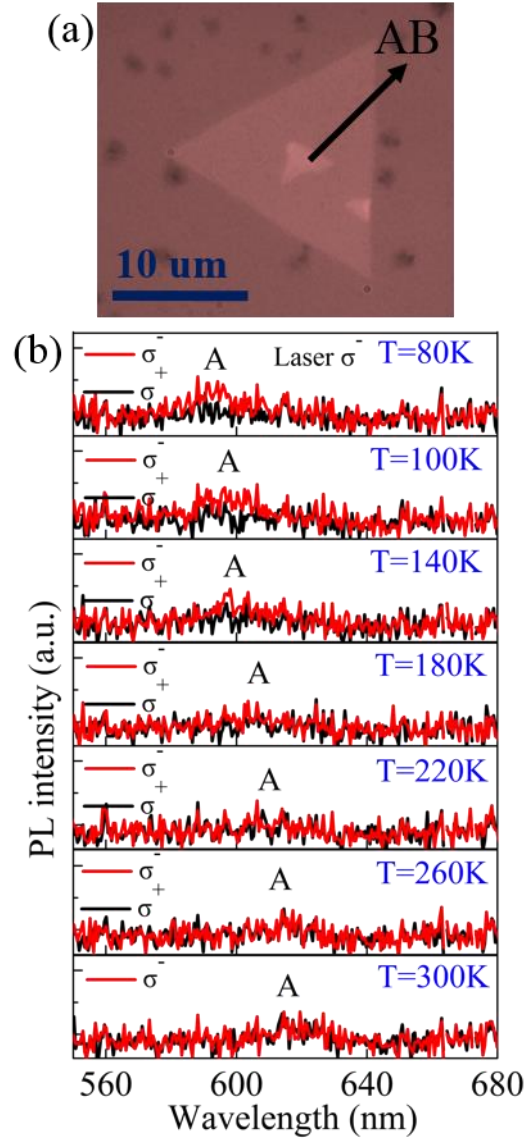

**Fig. S4** (a) Optical image of CVD-grown AB-stacked bilayer  $\text{WS}_2$  on sapphire substrate. (b) shows the corresponding circularly polarized PL spectra as a function of temperature. The excitation light is left-circularly polarized in all the measurements.

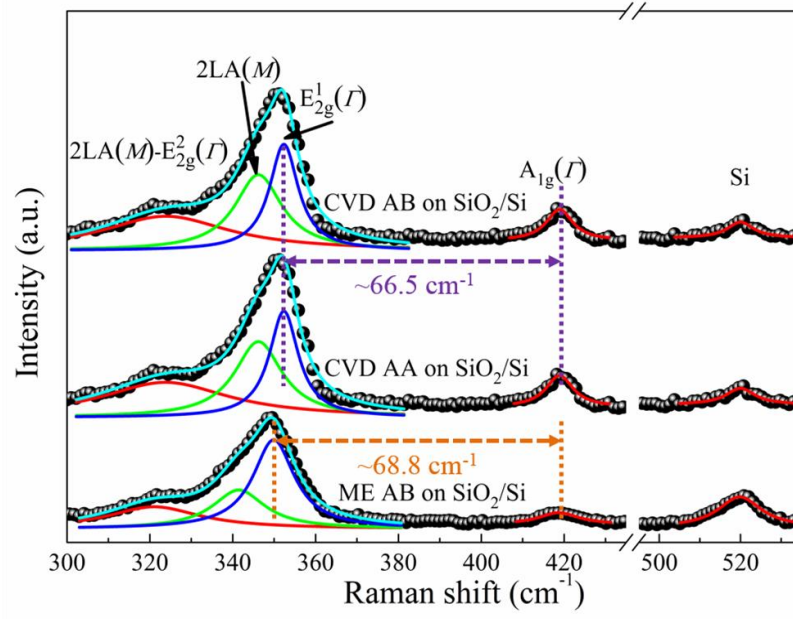

**Fig. S5** Raman spectra of CVD-grown (both AA- and AB-stacked) and ME bilayer WS<sub>2</sub> on SiO<sub>2</sub>/Si substrate with fitted curves. The dashed lines mark the frequency differences of E<sub>2g</sub><sup>1</sup>(I) and A<sub>1g</sub>(I) modes.
